# Supplementary material
Source: Elsevier journal article supplement (https://rcastoragev2.blob.core.windows.net/eb0674682fc2c83e32a25ac927768f11/mmc1.pdf)
Supplement: mmc1 [file mmc1.pdf]

**Supplemental information**

**Germ cell differentiation requires Tdrd7-dependent  
chromatin and transcriptome reprogramming  
marked by germ plasm relocalization**

**Fabio M. D'Orazio, Piotr J. Balwierz, Ada Jimenez González, Yixuan Guo, Benjamín Hernández-Rodríguez, Lucy Wheatley, Aleksandra Jasiulewicz, Yavor Hadzhiev, Juan M. Vaquerizas, Bradley Cairns, Boris Lenhard, and Ferenc Müller**

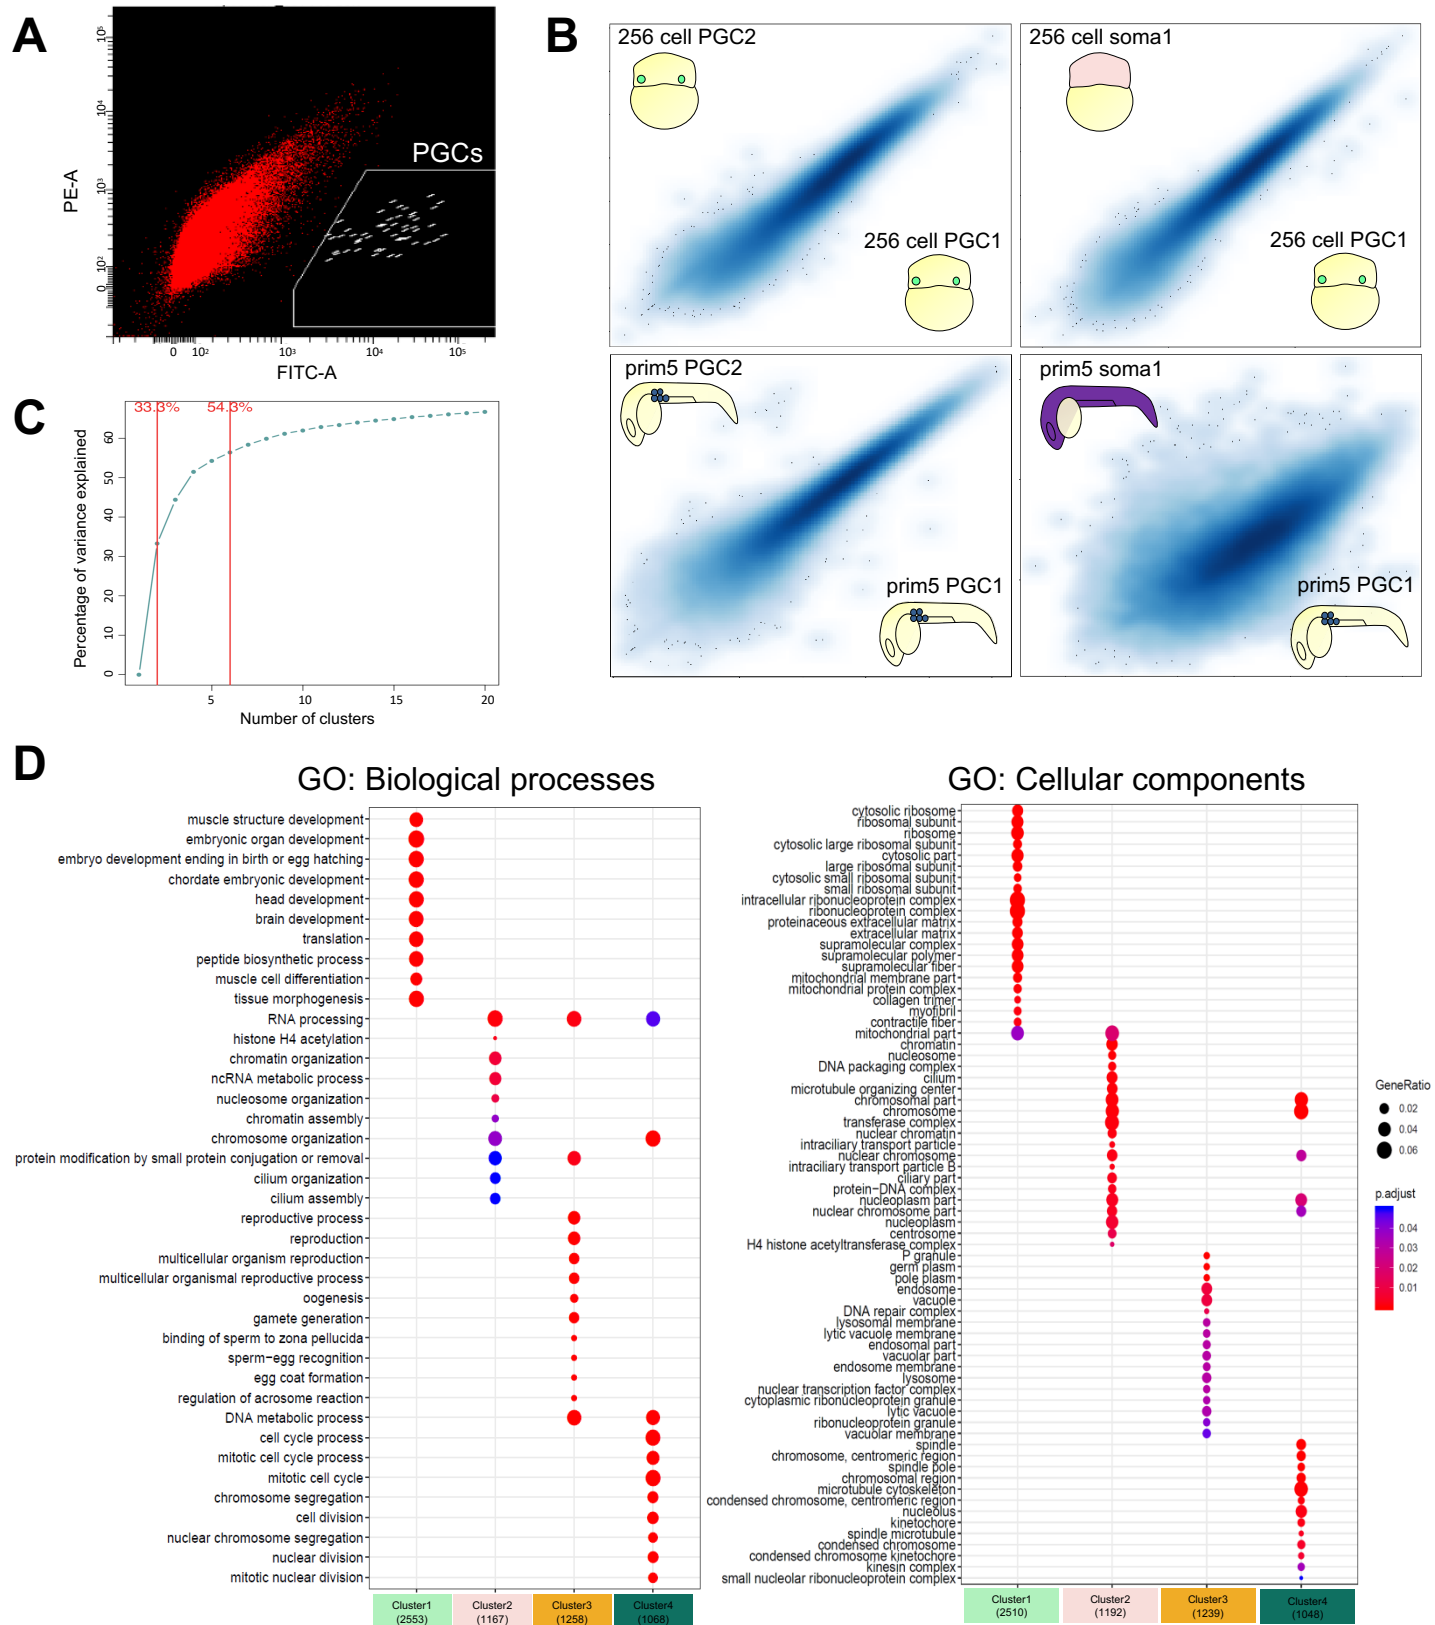

**Supplementary Figure 1. Characterisation of PGC transcriptome highlights early developmental similarities and late divergence between PGCs and somatic cells. Related to Figure 1** (A) FACS profile of GFP-expressing PGCs at prim-5 stage. GFP-positive and -negative cells are shown in white and red respectively. (B) Transcriptome correlation profiles after RNA-seq reads normalisation. Read counts for each gene were normalised for library size and gene length (tpm) and correlation among stages and cell types was compared. Reads are shown as  $\text{Log}_2(\text{tpm}+1)$ . (C) Justification of number of k-means selected based on inter-sample variance. (D) Biological processes and cellular components GO analysis for the four identified expression groups by k-mean clustering ( $p$ -adjusted  $< 0.05$ ).

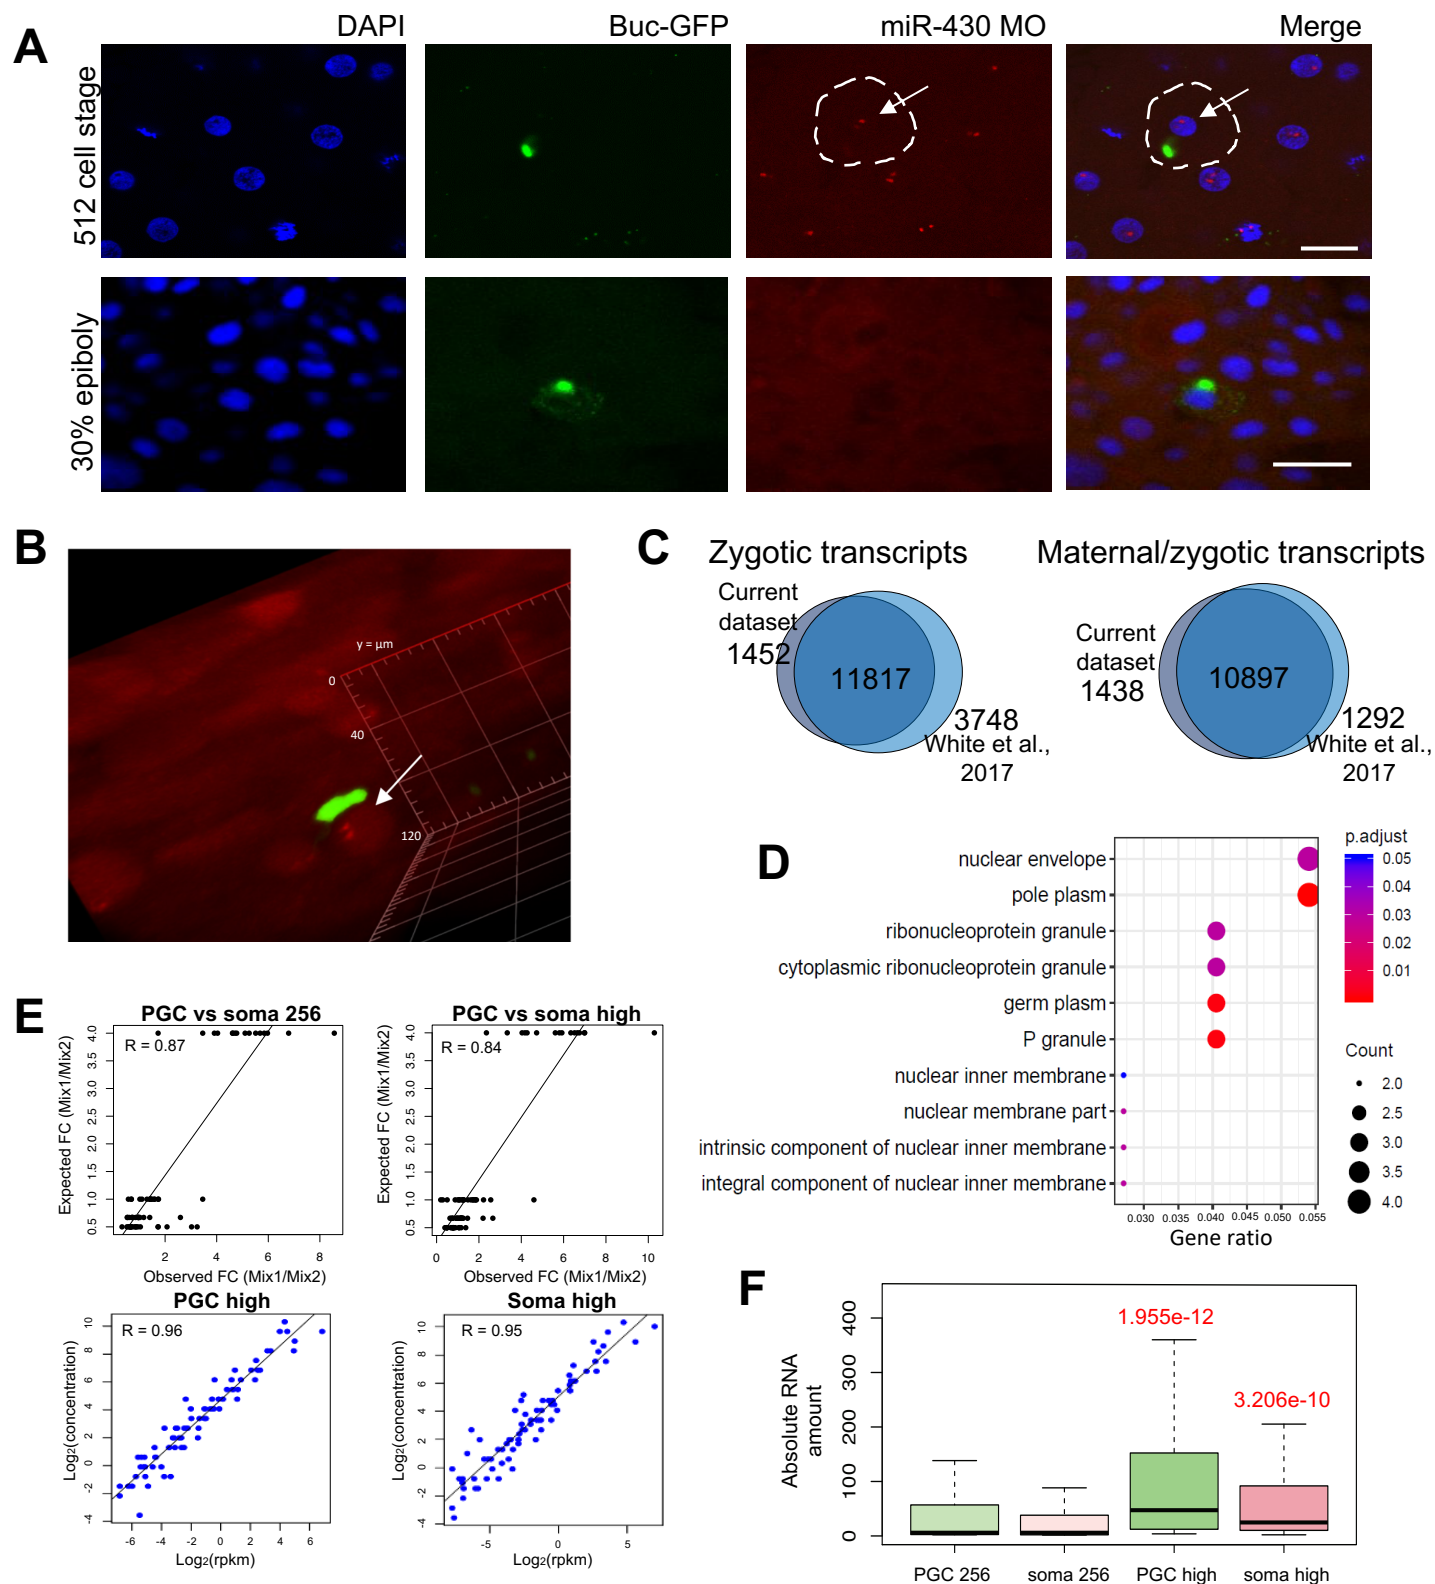

**Supplementary Figure 2. PGCs do not delay transcriptional activation. Related to Figure 2 (A)** Maximum intensity projection of a multi-stack image of *miR-430* transcriptional activity at 512-cell stage and 30% epiboly. PGC boundaries are highlighted as white, dashed lines. Arrow indicates the nucleus of a germ plasm-carrying cell where transcriptional foci are detected. Scale bar is 30  $\mu\text{m}$ . Number of embryos,  $n = 19$  and 31 respectively. **(B)** 3D rendering of a *miR-430*-expressing nucleus (arrow) and a GFP-tagged germ granule. White arrow indicates the germ cell nucleus. Number of embryos,  $n = 24$ . **(C)** Venn diagram for predicted zygotic/maternal and zygotic genes from two independent RNA-seq datasets. **(D)** Cellular components GO analysis for genes upregulated in PGCs after the first wave of ZGA (from 256-cell to high stage). P-adjusted  $< 0.05$ . **(E)** Representative regression scatter plots between expected vs observed ERCC mix ratios (top) and ERCC concentrations vs ERCC reads (bottom). Tpm threshold for normalised ERCC reads is 1. **(F)** Absolute RNA concentration normalised to internal control (ERCC spike-in) for genes upregulated in germ plasm-carrying cells between 256-cell and high stage. Numbers show p-values calculated by Wilcoxon test.

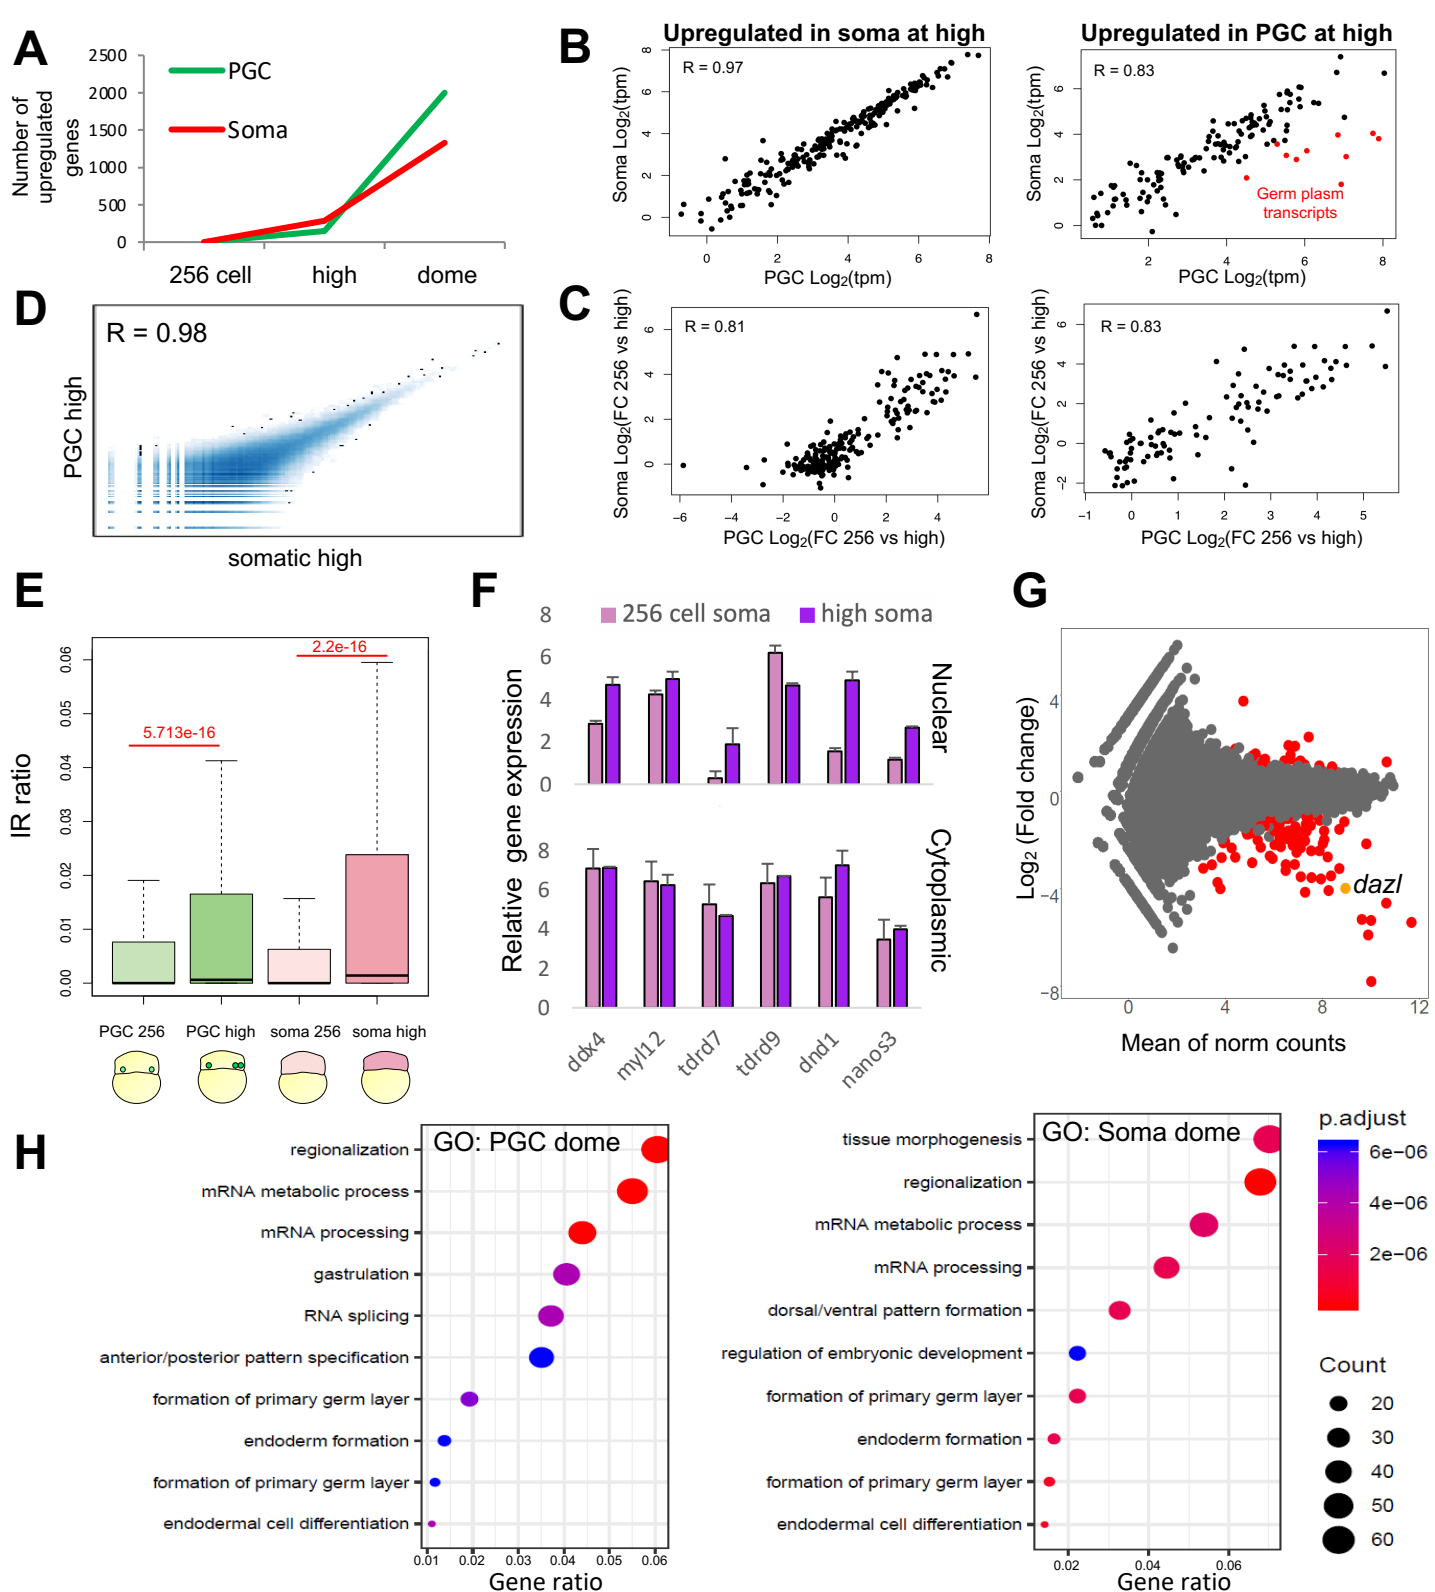

**Supplementary Figure 3. Differential transcriptome between PGCs and somatic cells at early stages is not caused by differential transcription. Related to Figure 3 (A)** Count of upregulated genes from previous stage in PGCs and somatic cells at high and dome stages. **(B)** Correlation of normalised RNA-seq reads (tpm) for genes upregulated from the previous stage in the PGCs or somatic cells only at high stage. Germ plasm genes are in red. **(C)** Correlation between fold change increases from 256-cell to high stages in PGCs and somatic cells for gene subsets. **(D)** Correlation plot for open chromatin regions detected in PGCs and somatic cells at high stage. **(E)** Intron retention ratio for all transcripts in PGCs (green) and somatic cells (purple) before and after ZGA. T-test was used to calculate p-values (in red). **(F)** Relative gene expression fold change normalised to a reference gene in somatic cells for nuclear and cytoplasmic fractions (number of replicates = 2). Error bars show standard errors. **(G)** Differential expressed genes between 256-cell and high stages in PGCs. Significantly differentially expressed genes are in red. *dazl* is in orange. P adjusted < 0.1, log<sub>2</sub>FC < -1/> 1. **(H)** Biological processes GO analysis for genes upregulated from high to dome.

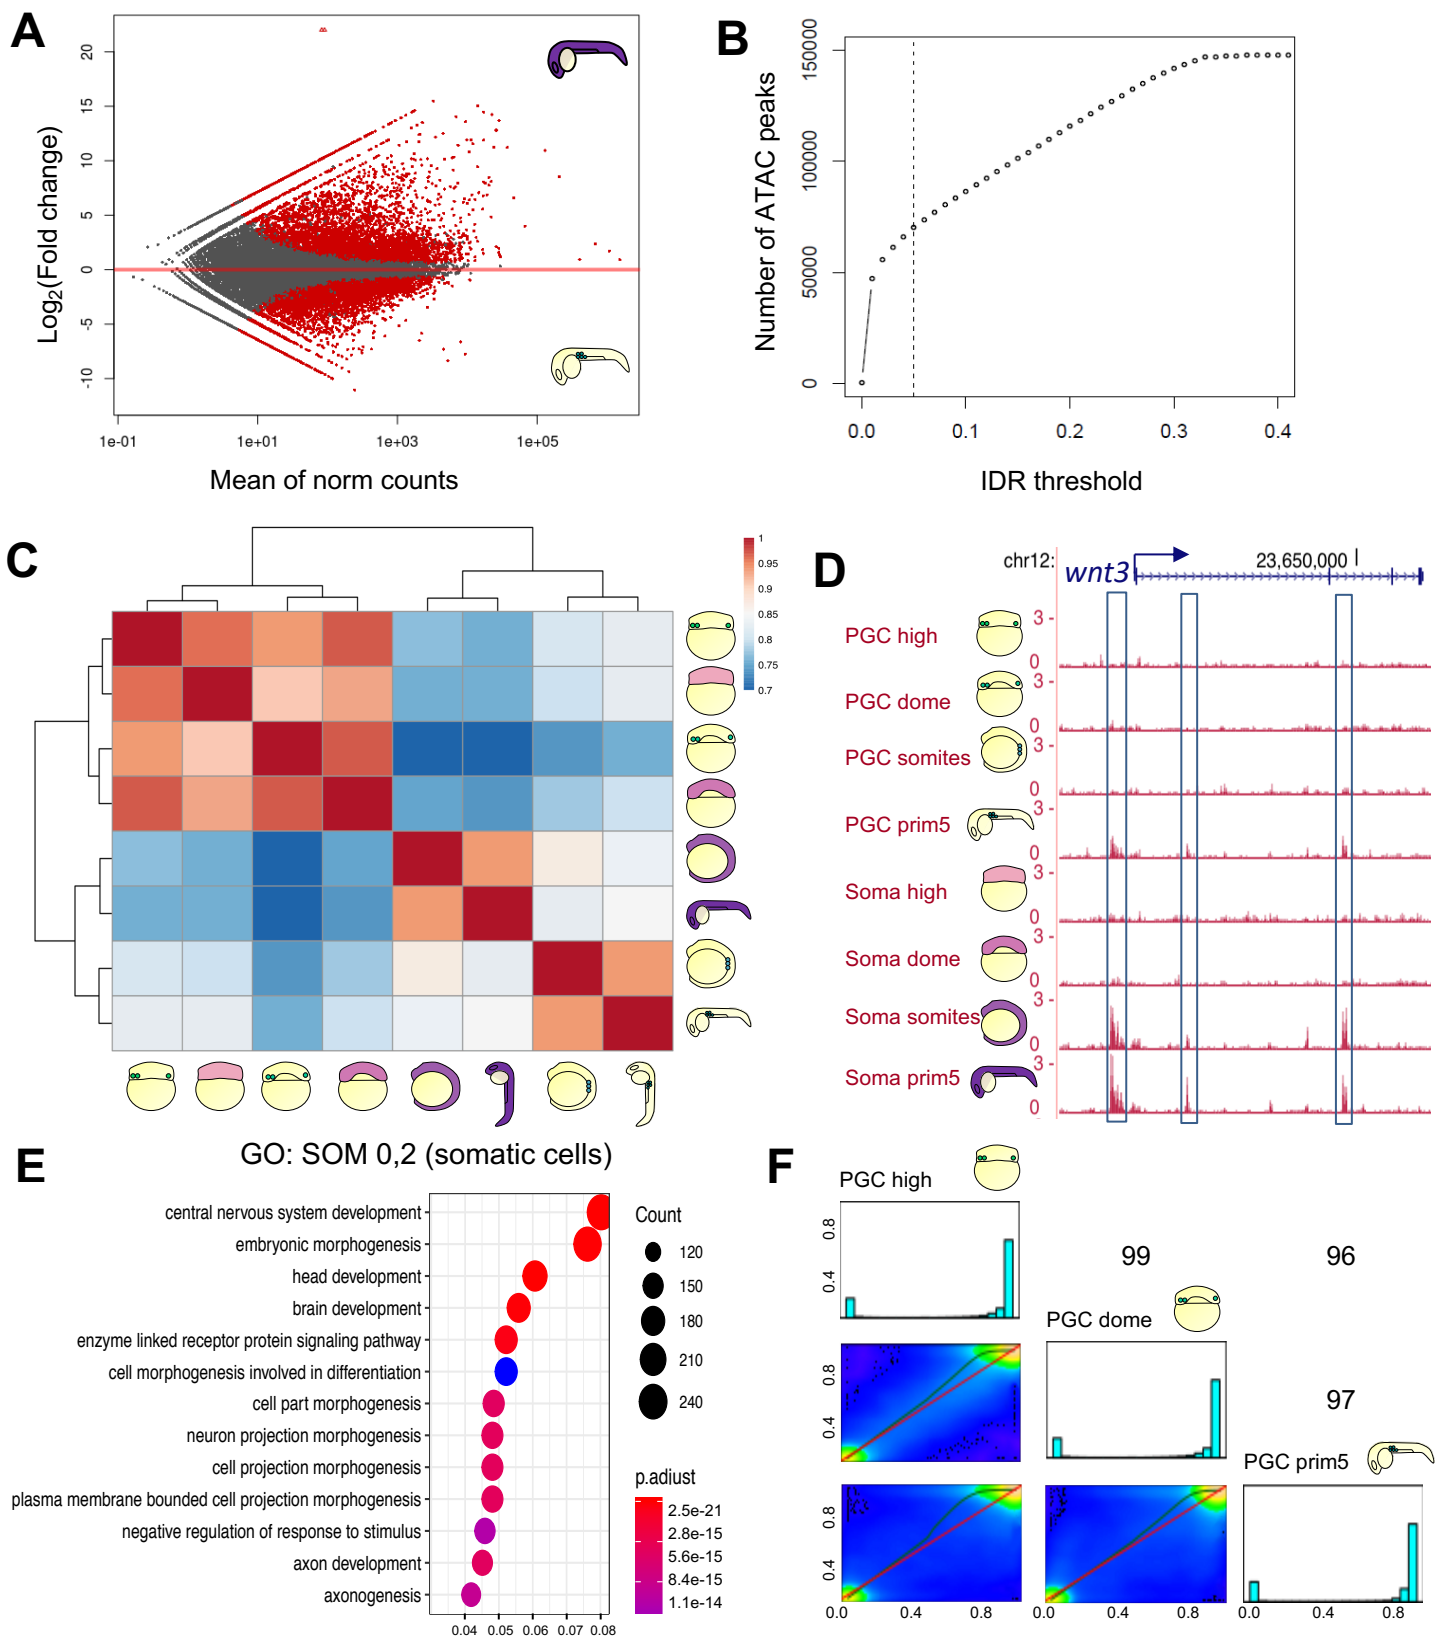

**Supplementary Figure 4. Gradual acquisition of germ identity is accompanied by epigenetic changes. Related to Figure 4 (A)** Differentially expressed genes in PGCs and somatic cells at prim-5 stage. Significantly differentially expressed genes are in red. P adjusted < 0.1. **(B)** Reproducible ATAC peaks identified in function of the Irreproducible Discovery Rate (IDR) threshold. **(C)** Unsupervised Pearson correlation heatmap for developmental stages and cell types after selection of reproducible ATAC peaks. **(D)** Genome browser view of ATAC-seq tracks (magenta) of *wnt3* gene in PGCs and somatic cells across early development. Blue boxes highlight putative regulatory elements. Arrows show transcriptional directionality. **(E)** GO terms for genes associated with open chromatin regions upregulated in late somatic cells. **(F)** CpG base Pearson correlation shown as heatmap and histogram of CpG frequency.

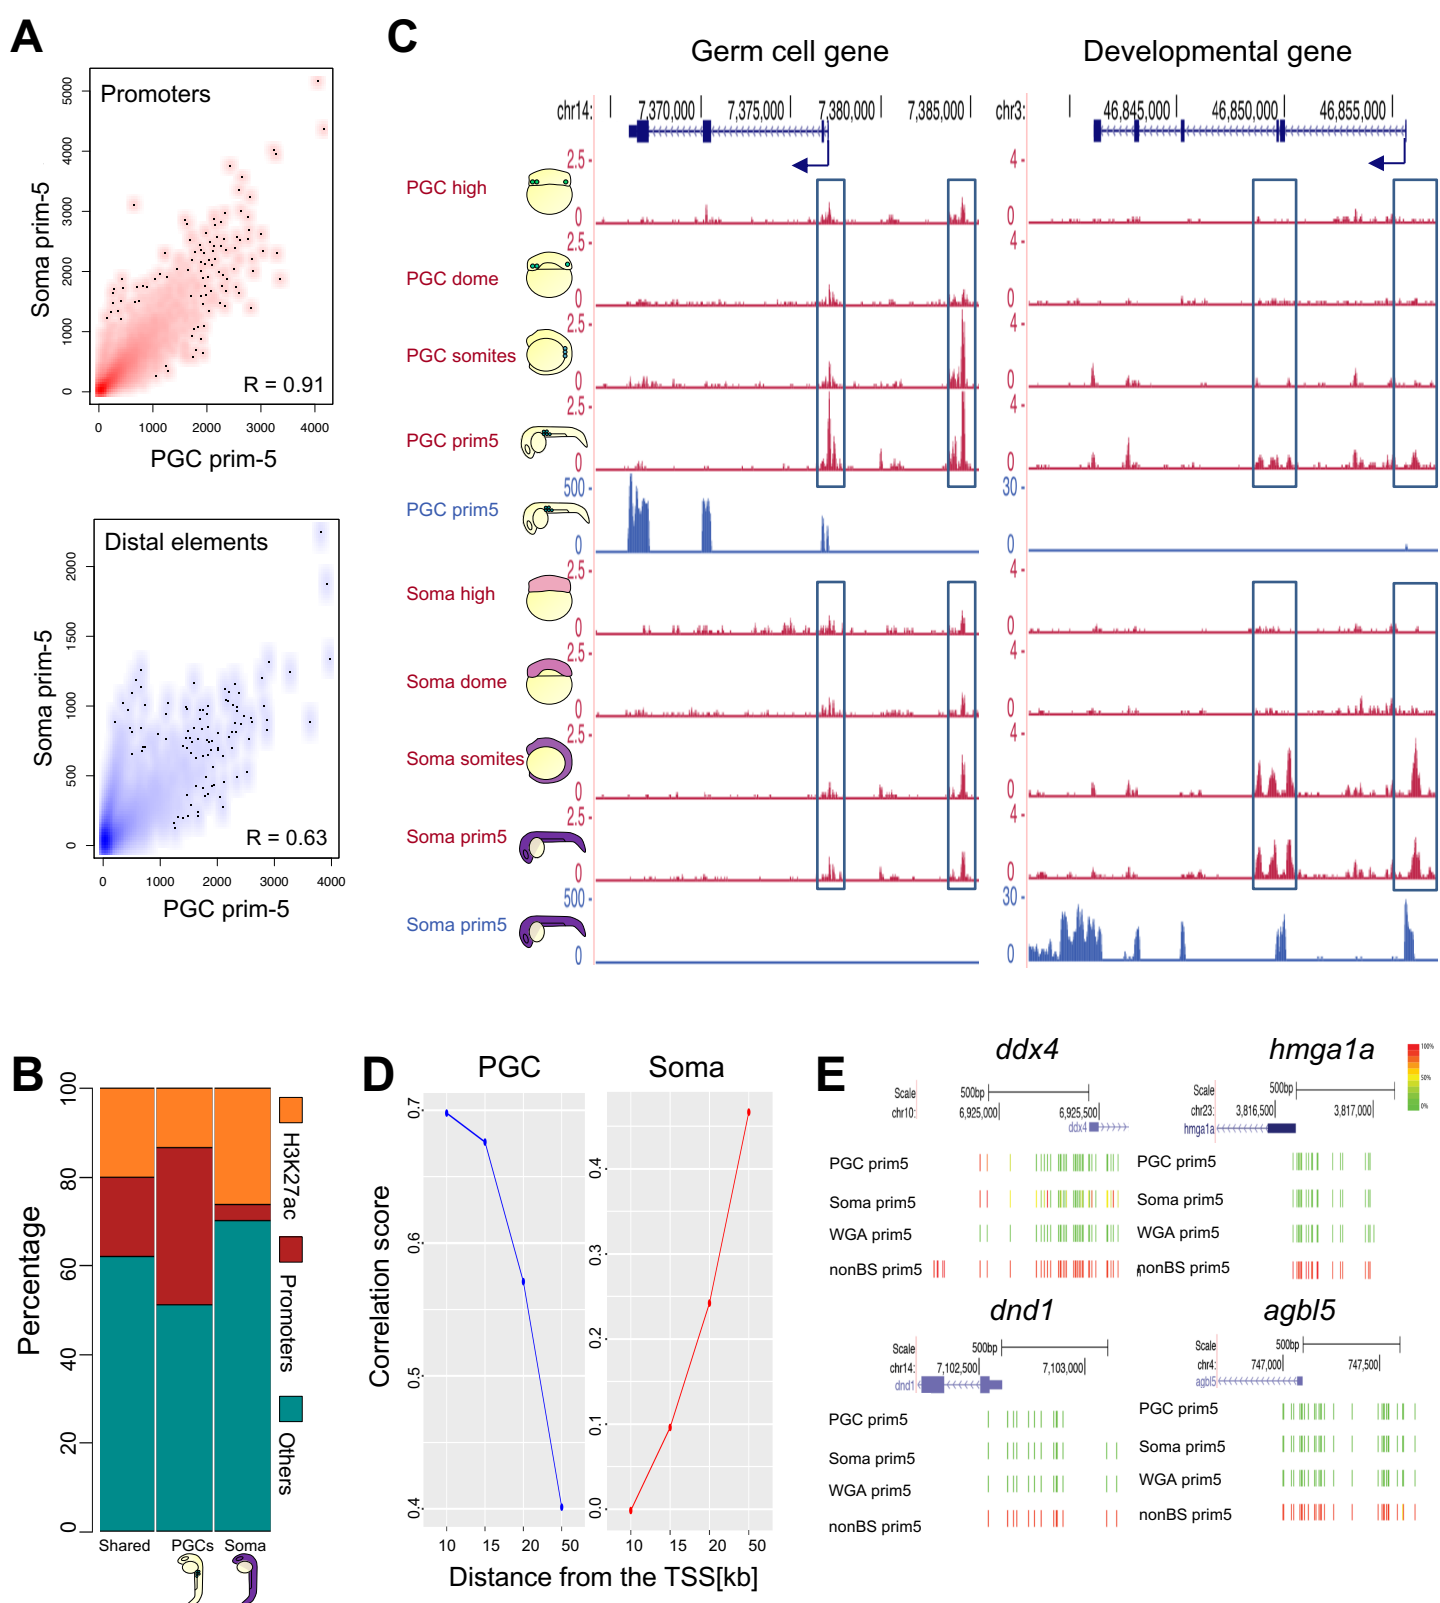

**Supplementary Figure 5. PGCs do not open chromatin at regions identified as putative enhancers. Related to Figure 5 (A)** Correlation scatter plots of ATAC peaks between PGCs and somatic cells for promoters and distal elements at prim-5 stage. **(B)** Percentage of ATAC peaks associated with H3K27ac and promoters in PGCs and somatic cells at prim-5 stage. **(C)** Genome browser view of open chromatin regions (ATAC-seq in magenta) and transcript levels (RNA-seq in blue) in PGCs and somatic cells. Blue boxes highlight putative regulatory elements and promoters. Arrows show transcriptional directionality. **(D)** Correlation score between chromatin accessibility and gene transcription in function of distance from the TSS. Correlation score is represented as the absolute ATAC log<sub>2</sub>FC value associated to genes upregulated in PGCs (blue) or somatic cells (red) **(E)** Genome browser view of four representative promoters upregulated in late PGCs versus somatic cells. CpG methylation levels are reported as coloured bars.



**A**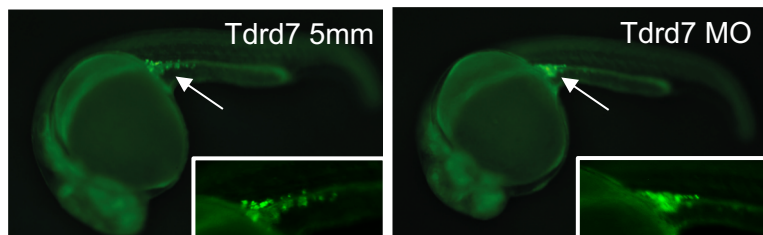**B**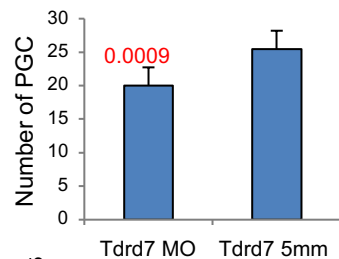**C**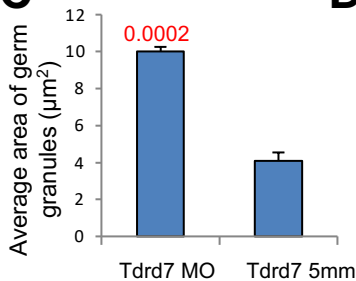**D**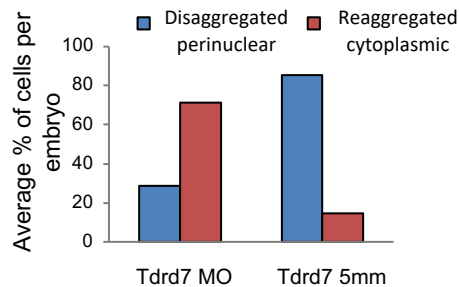**E**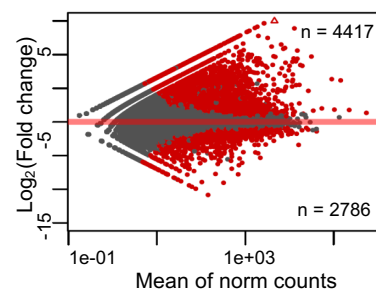**F**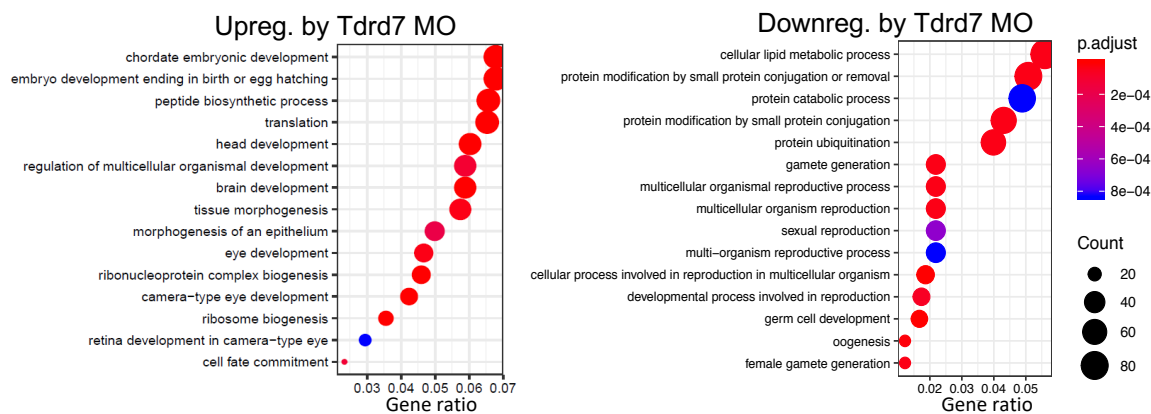**G**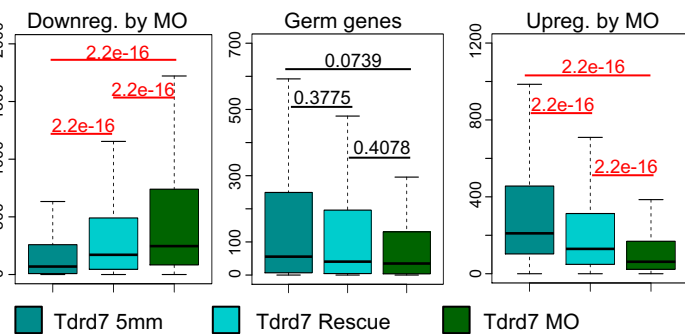**H**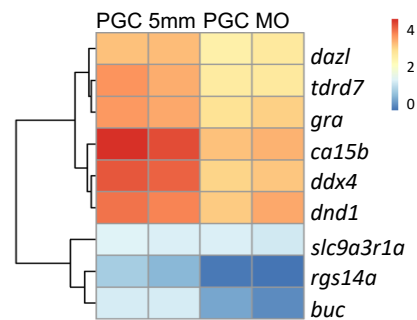**I**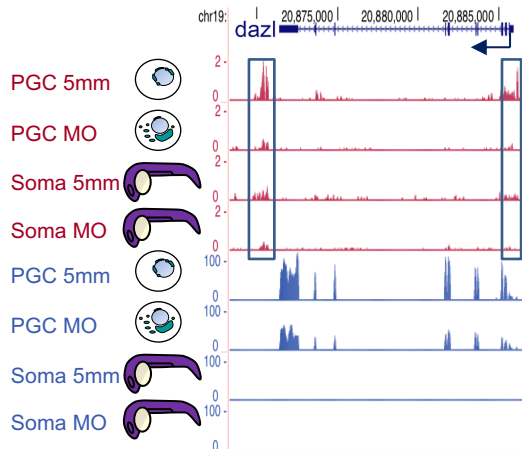**J**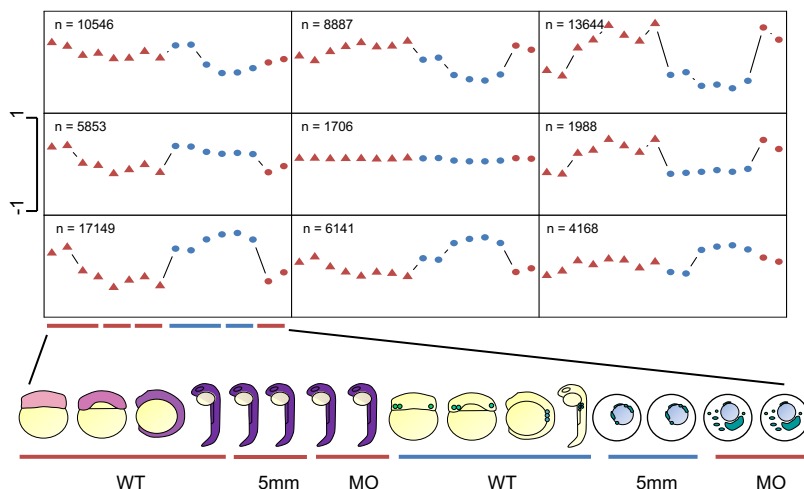

**Supplementary Figure 6. Tdrd7 knock-down impacts germ plasm morphology and transcriptome. Related to Figure 6** (A) Fluorescent microscopy of Buc-GFP-expressing embryos at prim-5 stage injected with *tdrd7* 5mm and *tdrd7* MO oligos (8 < n < 14). (B) Number of Buc-GFP-expressing cells per embryo at prim-5 stage. P-value against control is shown (10 < n < 15, p < 0.05). Red colour indicates significant difference based on Wilcoxon test. (C) Measurement of germ granule size. P-value against control is shown in red (9 < n < 12, p < 0.05). Based on Wilcoxon test. (D) Assessment of germ plasm phenotype shown as percentage of cells per embryo (10 < n < 15). (E) Differential expression analysis for genes upregulated and downregulated by Tdrd7 KD in PGCs at prim-5 stage. Significantly differentially expressed genes are in red. P adjusted < 0.1, log<sub>2</sub>FC < -1/> 1. (F) GO terms for genes upregulated and downregulated by Tdrd7 translational inhibition in PGCs. (G) Box plots of normalised RNA-seq counts (tpm) for selected gene classes. Numbers show p-values in red colour if < 0.005 or black if > 0.005 based on Wilcoxon test. (H) Gene expression heatmap for germ plasm-localised transcripts. Colour intensities indicate log<sub>2</sub>(tpm+1). (I) Genome browser view of ATAC profiles after morpholino injections. Open chromatin (ATAC-seq) is shown in magenta and normalised transcript levels (RNA-seq) are shown in blue. Arrows show transcriptional directionality. (J) Self-organising map of reproducible open chromatin regions. Wild type (WT) PGCs and somatic cells are represented as circles and triangles respectively. Tdrd7 KD PGCs are shown as red circles.
